# Supplementary material for: The short coiled-coil domain-containing protein UNC-69 cooperates with UNC-76 to regulate axonal outgrowth and normal presynaptic organization in Caenorhabditis elegans
Source: PubMed Central journal article supplement (PMC1561584; doi:10.1186/jbiol39), 2006-05-25
Supplement: jbiol39-s1.pdf [file jbiol39-s1.pdf]

## Additional data file 1

### Supplemental Results

#### unc-69(ok339) deletion

*unc-69(ok339)* deletes a 2.65 kb genomic fragment encompassing the whole *unc-69* transcription unit as well as flanking sequences both 5' and 3' of the gene (Supplemental Figure S1). Thus, this deletion is certain to represent a null allele of *unc-69*. *unc-69(ok339)* homozygotes have an Unc phenotype and arrest during L1 to L2 transition (Supp. Table S2). We found that *ok339* also deletes *T07A5.5* (predicted to encode the *C. elegans* homolog of the Ost4p subunit of the *S. cerevisiae* oligosaccharyltransferase) and ends but 200 bp 5' of the *unc-50* coding region (unpublished). We reasoned that the *ok339* arrest phenotype could either be due to loss of *T07A5.5*, or a synthetic phenotype due to the simultaneous loss of both *unc-50* and *unc-69* function. Indeed, *unc-69(ok339)* mutant worms were resistant to 25mM levamisole, a hallmark of *unc-50* mutations. Furthermore the *ok339* deletion failed to complement *unc-50(e306)* mutants (data not shown). We balanced *unc-69(ok339)* with *qC1*, and microinjected a 6.7 kb Hind III-EcoR I genomic fragment (*pUnc50-10*) carrying wild-type copies of both *unc-50* and *T07A5.5* into the deletion carrying strain. Transgenic worms homozygous for *unc-69(ok339)* grew to adulthood but were sterile (three independent lines). It is likely that the sterility is due to lack of germline expression of *T07A5.5* off the extrachromosomal array. For this reason, we did not pursue usage of *unc-69(ok339)* in our studies.

#### The *unc-69* locus encodes multiple splice variants

We found a splice variant of *unc-69* by sequencing EST clones provided by Yuji Kohara (National Institute of Genetics, Japan), which we termed *T07A5.6b* (GenBank accession number AY919833). This splice variant (encoded by *yk508g10*) adds another 14 amino acids (DDSVHDDDFGEYEEY) to the carboxyl terminus of UNC-69. The small peptide is enriched in acidic amino acid residues, and

makes the carboxyl terminus quite acidic (Figure 1a,b). Wormbase also predicts the existence of splice variant *T07C4.10a*, which could encode a 1138-amino-acid protein. We have failed to obtain any experimental evidence to support the existence of this latter splice variant. It is likely that *T07C4.10a* is either expressed at a very low level or is improperly predicted. Therefore we removed the *unc-69* coding sequence from *T07C4.10a* and renamed the remaining coding sequence as *T07C4.10* (Supp. Figure S1; also see WormBase [55]).

#### UNC-69 homologs

A *C. elegans unc-69* cDNA was used to probe a *C. briggsae* genomic library (gift of D. Baillie) in lambda Charon4 under low stringency conditions (hybridization at 55°C in 6x SSPE, 0.5% SDS, washing at 55°C, twice in 2x SSPE, 0.5% SDS, and twice in 0.5x SSPE, 0.5% SDS). Positive phage were purified and EcoR I insert fragments were subcloned into pBluescript, and their DNA sequence determined. We also identified hybridizing bands in *C. vulgaris*, *C. remanei*, and *Ascaris suum*. Additional UNC-69-like proteins were found in the expressed sequence tag (EST) database of rat (CB577413) and chimpanzee (AU298017). Partial UNC-69 sequences were also found in chick EST collections (BU311615). Surprisingly, the primary amino-acid sequences of rat, mouse, chimpanzee and human are 100% identical.

#### Homophilic interaction of UNC-69

In many proteins, a coiled coil domain mediates homophilic dimer- or trimer- formation. We thus used the Y2H system to assay UNC-69's ability to interact with itself. We created yeast GAL4 DNA binding domain (DB)- and activation domain (AD)-UNC-69 fusion constructs, and transformed them into the yeast reporter strain HF7c. A very weak expression of the His reporter, as assayed by growth on LWH-plates, was observed just above background level. However the interaction was not strong enough to activate the LacZ reporter above background level (data not shown).

**Supplemental Table S1. *unc-69* mutants lay more eggs in the absence of food than wild-type animals**

| Genotype            | Eggs laid (M9 assay) |                   |   | Eggs laid (plate assay) |        |   |
|---------------------|----------------------|-------------------|---|-------------------------|--------|---|
|                     | M9                   | M9 + 5 mg/ml 5-HT | n | - Food                  | + Food | n |
| Wild type           | 0                    | 26                | 5 | 0                       | 30     | 5 |
| <i>unc-69(e587)</i> | 13                   | ND                | 5 | 16                      | 28     | 5 |
| <i>unc-69(e602)</i> | 14                   | ND                | 5 | 5                       | 11     | 5 |

Total number of eggs laid in 60 min. (M9 assay) or 90 min. (plate assay) was determined. n, number of animals tested. ND, not done.

**Supplemental Table S2. *unc-69(ok339)* mutants arrest development as L1 larvae**

| Genotype                 | Eggs laid per animal | Progeny      |                | n |
|--------------------------|----------------------|--------------|----------------|---|
|                          |                      | Hatching (%) | L1 arrest (%)* |   |
| <i>qC1/unc-69(ok339)</i> | 157±26               | 99.9±0.9     | 24.2±4.1       | 9 |

\*L1 arrest (%) represents per cent of hatched progeny that failed to develop past the first larval (L1) stage within six days of hatching (wild-type larvae remain in the L1 stage for about 12 h at 20°C). L1 arrested larvae were confirmed to be *unc-69(ok339)* homozygotes by nested PCR. Data are mean±s.d. n, number of broods analyzed.

We also assayed for a homophilic interaction of UNC-69 *in vitro* in several different ways. Maltose-binding protein (MBP)-tagged and GST-tagged UNC-69 were expressed in bacteria and used in pull-down assays using column of beads against either one or the other of the fusion proteins followed by western analysis. We were not able to observe any interaction between GST-UNC-69 and MBP-UNC-69 (data not shown). We also *in vitro* translated S-tagged and T7-tagged UNC-69 proteins separately, mixed the proteins at room temperature, immunoprecipitated with anti-T7 beads followed by western blots using antibodies against the S-tag. No interaction between T7-UNC-69 and S-UNC-69 was observed, even when the conditions were extremely mild. Finally we failed to observe any homophilic interaction of UNC-69 when T7-UNC-69 and S-UNC-69 were cotranslated *in vitro* (data not shown). These results suggest that UNC-69 likely does not interact with itself.

#### ***unc-76* interacts genetically with *unc-16* and *vab-8***

In *C. elegans*, UNC-16 associates with the RUN-domain protein UNC-14 and the Kinesin-1 light chain KLC-2 [9]. In

addition, UNC-14, a serine/threonine kinase UNC-51, and VAB-8 associate with each other to regulate axonal outgrowth [10]. To explore possible genetic interactions between these Kinesin-1-interacting proteins and the UNC-69-UNC-76 complex, we assayed AWC axon extension defects in different double mutant backgrounds.

We first analyzed AWC axon extension defects in *unc-116(e2310); unc-76(e911)* double mutants. The *unc-116(e2310)* mutation only caused very mild axon extension defect on its own. However, like other axon guidance mutants, *unc-116(e2310)* significantly enhanced the AWC axon extension defects of *unc-76(e911)* mutants (Supp. Table S3).

We then assayed AWC axon extension defects in various *unc-16; unc-76, unc-76 unc-51, and vab-8 unc-76* double mutant backgrounds (for technical reasons we did not analyze *unc-14; unc-76* double mutants). The *unc-51(e369)* mutation resulted in a very mild defect, and did not enhance AWC axon extension defects caused by the *unc-76(e911)* mutation (Supp. Table S3). Surprisingly, mutations in *unc-16* and *vab-8*, when introduced into a *unc-76(e911)* background, either slightly or significantly suppressed the AWC axon extension defects (Supp. Table S3). Thus, *unc-76* shows intriguing patterns of genetic interactions with both *unc-16* and *vab-8* in AWC neuronal fate determination. However, our data do not indicate if UNC-16 and VAB-8 directly participate in the UNC-76-UNC-69-dependent AWC axon extension processes. The relationship between UNC-76, UNC-16 and VAB-8 will thus need to be further analyzed.

**Supplemental Table S3. *unc-16* and *vab-8* mutations suppress the AWC axon extension defect of *unc-76(e911)* mutant.**

| Genotype                                      | 2 AWC <sup>OFF</sup> (%) | 1 AWC <sup>CON</sup> (%) | 2 AWC <sup>CON</sup> (%) | n   |
|-----------------------------------------------|--------------------------|--------------------------|--------------------------|-----|
| Wild type                                     | 1                        | 99                       | 0                        | 442 |
| <i>unc-76(e911)</i>                           | 47                       | 53                       | 0                        | 101 |
| <i>unc-116(e2310)</i>                         | 2                        | 98                       | 0                        | 111 |
| <i>unc-16(ju146)</i>                          | 0                        | 100                      | 0                        | 76  |
| <i>unc-16(e109)</i>                           | 1                        | 99                       | 0                        | 104 |
| <i>unc-51(e369) rol-9(sc148)</i>              | 1                        | 98                       | 1                        | 90  |
| <i>vab-8(ev411)</i>                           | 0                        | 100                      | 0                        | 61  |
| <i>vab-8(gm84)</i>                            | 1                        | 99                       | 0                        | 70  |
| <i>unc-116(e2310); unc-76(e911)</i>           | 66                       | 34                       | 0                        | 151 |
| <i>unc-16(ju146); unc-76(e911)</i>            | 12                       | 88                       | 0                        | 197 |
| <i>unc-16(e109); unc-76(e911)</i>             | 4                        | 84                       | 12                       | 197 |
| <i>unc-76(e911) unc-51(e369) rol-9(sc148)</i> | 46                       | 54                       | 0                        | 219 |
| <i>vab-8(ev411) unc-76(e911)</i>              | 30                       | 70                       | 0                        | 130 |
| <i>vab-8(gm84) unc-76(e911)</i>               | 28                       | 72                       | 0                        | 301 |

All animals scored had *kyls140* (*P<sub>str-2</sub>::gfp*) in the background. n: number of animals scored.
