# Supplementary material for: The short coiled-coil domain-containing protein UNC-69 cooperates with UNC-76 to regulate axonal outgrowth and normal presynaptic organization in Caenorhabditis elegans
Source: PubMed Central journal article supplement (PMC1561584; doi:10.1186/jbiol39), 2006-05-25
Supplement: jbiol39-s2.pdf [file jbiol39-s2.pdf]

**Additional data file 2**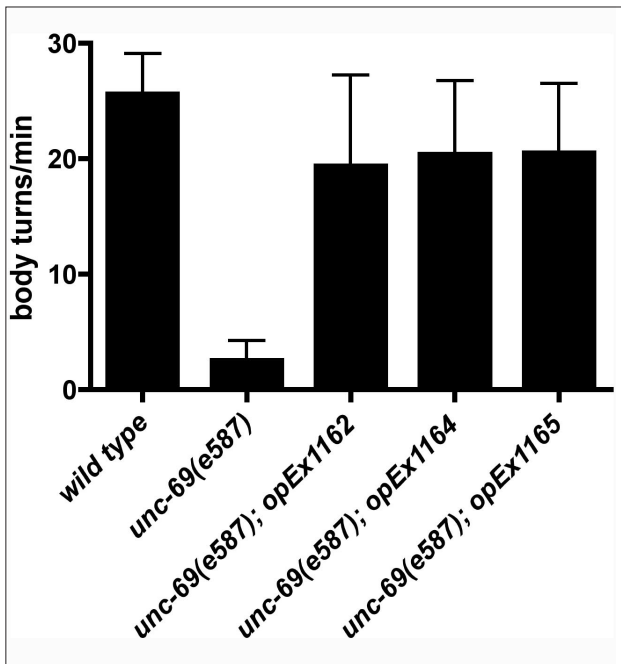**Supplemental Figure S1 (Additional data file 2)**

Overexpression of a full-length UNC-69(M11)::GFP protein rescues locomotion defects of the *unc-69(e587)* mutants. pSU86 (*Punc-69::unc-69(M11)::gfp*) was microinjected at 50 ng/ml into *unc-69(e587); lin-15(n765ts)* mutant hermaphrodites. Non-Muv transgenic hermaphrodites were selected for further characterization. Three independent transgenic lines were assayed for locomotion improvement. For wild type,  $n = 14$ . For the other genotypes,  $n = 10$ . Data shown represent mean  $\pm$  S.D. Note that all transgenic lines also carry the *lin-15(n765ts)* mutation in the background.
