# Supplementary material for: The short coiled-coil domain-containing protein UNC-69 cooperates with UNC-76 to regulate axonal outgrowth and normal presynaptic organization in Caenorhabditis elegans
Source: PubMed Central journal article supplement (PMC1561584; doi:10.1186/jbiol39), 2006-05-25
Supplement: jbiol39-s3.pdf [file jbiol39-s3.pdf]

### Additional data file 3

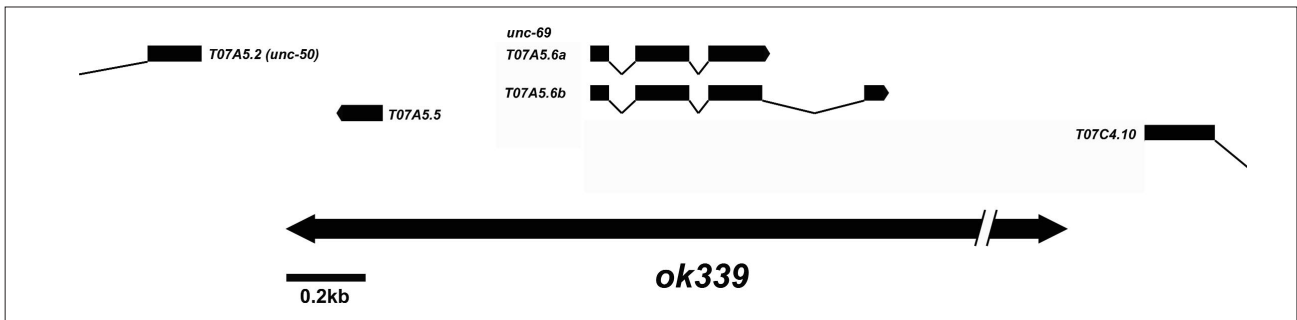

#### Supplemental Figure S2 (Additional data file 3)

Extent of the *ok339* deletion. *ok339* deletes a 2.65 kb genomic region containing both verified splice variants of *unc-69*, as well as the predicted single-exon gene *T07A5.5*. Deletion breakpoints: 5'-TAAATTAGGG/tagagacgaa ... 2.65 kb ... gtcacggtg/TCACACGTTT-3'.
