# Supplementary material for: The short coiled-coil domain-containing protein UNC-69 cooperates with UNC-76 to regulate axonal outgrowth and normal presynaptic organization in Caenorhabditis elegans
Source: PubMed Central journal article supplement (PMC1561584; doi:10.1186/jbiol39), 2006-05-25
Supplement: jbiol39-s4.pdf [file jbiol39-s4.pdf]

Additional data file 4

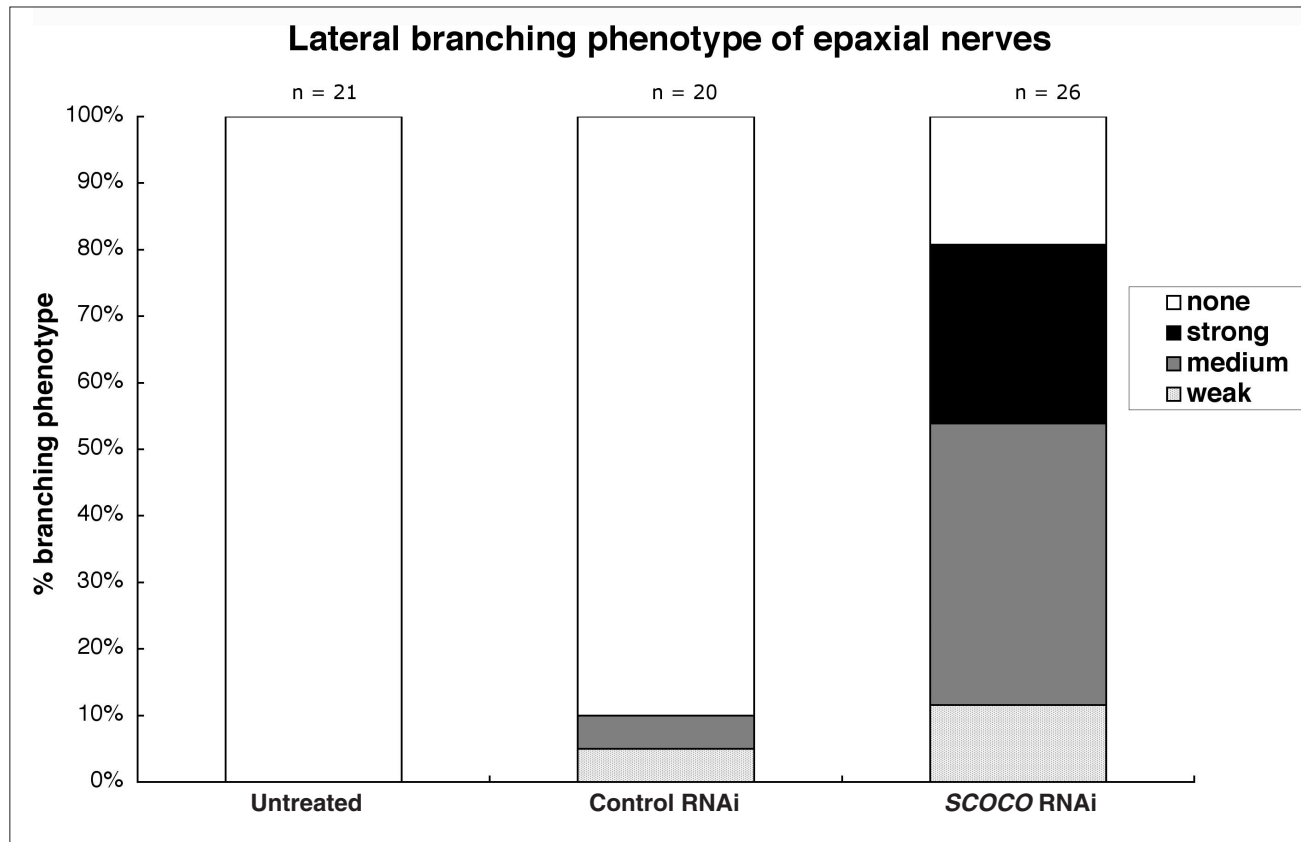

**Supplemental Figure S3 (Additional data file 4)**

RNAi knockdown of chicken UNC-69/SCOCO results in epaxial nerve pathfinding defects. Untreated, control (*yfp*-RNAi)-treated, and *SCOCO* RNAi-treated chicken embryos were scored for epaxial nerve defects. Embryos were classified into four groups, depending on whether they showed a strong, medium, weak, or no epaxial nerve defect.
